# Supplementary material
Source: ML conference proceedings conference paper supplement (https://openreview.net/forum?id=strvrjSi3C)
Supplement: supplementary_material [file attachment]

## Supplementary Materials

### A Proofs of Theorem 1

We basically follow the arguments in the convergence of Euclidean SAM [50], but the details are totally different.

**Lemma 1** (Properties of Retraction Smoothness). *Let  $w^* = R_w(\rho \text{grad}\mathcal{L}(w))$  and the curve  $\gamma(t) = R_w(t\eta)$  with the endpoints  $\gamma(0) = w$  and  $\gamma(1) = w^*$ . Then, we have*

$$\langle \mathcal{T}(\gamma)_{w^*}^w \text{grad}\mathcal{L}(w^*), \text{grad}\mathcal{L}(w) \rangle \geq (1 - \rho L_R) \|\text{grad}\mathcal{L}(w)\|_w^2$$

*Proof.* By the condition (C-5), we have

$$\|\mathcal{T}(\gamma)_{w^*}^w \text{grad}\mathcal{L}(w^*) - \text{grad}\mathcal{L}(w)\|_w \leq L_R \|\eta\|_w$$

By the Cauchy-Schwarz inequality, we have

$$\begin{aligned} |\langle \mathcal{T}(\gamma)_{w^*}^w \text{grad}\mathcal{L}(w^*) - \text{grad}\mathcal{L}(w), \eta \rangle_w| &\leq \|\mathcal{T}(\gamma)_{w^*}^w \text{grad}\mathcal{L}(w^*) - \text{grad}\mathcal{L}(w)\|_w \|\eta\|_w \\ &\leq L_R \|\eta\|_w^2 \\ &\leq \rho^2 L_R \|\text{grad}\mathcal{L}(w)\|_w^2 \end{aligned}$$

Therefore, we obtain

$$\langle \mathcal{T}(\gamma)_{w^*}^w \text{grad}\mathcal{L}(w^*) - \text{grad}\mathcal{L}(w), \rho \text{grad}\mathcal{L}(w) \rangle_w \geq -\rho^2 L_R \|\text{grad}\mathcal{L}(w)\|_w^2$$

Removing the constant  $\rho$ , the above inequality becomes

$$\langle \mathcal{T}(\gamma)_{w^*}^w \text{grad}\mathcal{L}(w^*) - \text{grad}\mathcal{L}(w), \text{grad}\mathcal{L}(w) \rangle_w \geq -\rho L_R \|\text{grad}\mathcal{L}(w)\|_w^2$$

Lastly, we arrive at the final result as

$$\begin{aligned} \langle \mathcal{T}(\gamma)_{w^*}^w \text{grad}\mathcal{L}(w^*), \text{grad}\mathcal{L}(w) \rangle_w &= \langle \mathcal{T}(\gamma)_{w^*}^w \text{grad}\mathcal{L}(w^*) - \text{grad}\mathcal{L}(w), \text{grad}\mathcal{L}(w) \rangle_w + \|\text{grad}\mathcal{L}(w)\|_w^2 \\ &\geq (1 - \rho L_R) \|\text{grad}\mathcal{L}(w)\|_w^2 \end{aligned}$$

□

In the next lemma, we will show the alignment of the true Riemannian gradient and the true Riemannian SAM gradient.

**Lemma 2** (Alignment of the true Riemannian gradient and the true Riemannian SAM gradient). *Let us denote the stochastic Riemannian gradient at time  $t$  by  $\text{grad}\mathcal{L}_t(w) = \frac{1}{b} \sum_{i \in J_t} \text{grad}\mathcal{L}(w; x_i) \in T_w \mathcal{M}$  and  $w^{adv} = R_w(\rho \text{grad}\mathcal{L}_t(w))$ . Further, let  $\gamma(t) = R_w(t\eta)$  be a retraction curve with  $\gamma(0) = w$  and  $\gamma(1) = w^{adv}$ . Then, we have the following inequality*

$$\mathbb{E} \left[ \left\langle \mathcal{T}(\gamma)_{w^{adv}}^w \text{grad}\mathcal{L}_t(w^{adv}), \text{grad}\mathcal{L}(w) \right\rangle_w \right] \geq \left( \frac{1}{2} - \rho L_R - 3\rho^2 L_R^2 \right) \|\text{grad}\mathcal{L}(w)\|_w^2 - \frac{2\rho^2 L_R^2 \sigma^2}{b}$$

*Proof.* Let  $w^* = R_w(\rho \text{grad}\mathcal{L}(w))$  evaluated on the loss function. We first add and subtract  $\langle \mathcal{T}(\zeta)_{w^*}^w \text{grad}\mathcal{L}_t(w^*), \text{grad}\mathcal{L}(w) \rangle_w$  where  $\zeta(t) = R_w(t\xi)$  is a retraction curve where  $\zeta(0) = w$  and  $\zeta(1) = w^*$ .

$$\begin{aligned} \langle \mathcal{T}(\gamma)_{w^{adv}}^w \text{grad}\mathcal{L}_t(w^{adv}), \text{grad}\mathcal{L}(w) \rangle_w &= \underbrace{\langle \mathcal{T}(\gamma)_{w^{adv}}^w \text{grad}\mathcal{L}_t(w^{adv}) - \mathcal{T}(\zeta)_{w^*}^w \text{grad}\mathcal{L}_t(w^*), \text{grad}\mathcal{L}(w) \rangle_w}_{T_1} \\ &\quad + \underbrace{\langle \mathcal{T}(\zeta)_{w^*}^w \text{grad}\mathcal{L}_t(w^*), \text{grad}\mathcal{L}(w) \rangle_w}_{T_2} \end{aligned}$$

We will bound two terms,  $T_1$  and  $T_2$ , separately. Regarding the term  $T_1$ , we derive

$$\begin{aligned} -T_1 &= -\langle \mathcal{T}(\gamma)_{w^{adv}}^w \text{grad}\mathcal{L}_t(w^{adv}) - \mathcal{T}(\zeta)_{w^*}^w \text{grad}\mathcal{L}_t(w^*), \text{grad}\mathcal{L}(w) \rangle_w \\ &\leq \frac{1}{2} \left\| \mathcal{T}(\gamma)_{w^{adv}}^w \text{grad}\mathcal{L}_t(w^{adv}) - \mathcal{T}(\zeta)_{w^*}^w \text{grad}\mathcal{L}_t(w^*) \right\|_w^2 + \frac{1}{2} \left\| \text{grad}\mathcal{L}(w) \right\|_w^2 \\ &\leq \left\| \mathcal{T}(\gamma)_{w^{adv}}^w \text{grad}\mathcal{L}_t(w^{adv}) - \text{grad}\mathcal{L}_t(w) \right\|_w^2 + \left\| \mathcal{T}(\zeta)_{w^*}^w \text{grad}\mathcal{L}_t(w^*) - \text{grad}\mathcal{L}_t(w) \right\|_w^2 + \frac{1}{2} \left\| \text{grad}\mathcal{L}(w) \right\|_w^2 \\ &\leq L_R^2 \|\rho \text{grad}\mathcal{L}_t(w)\|_w^2 + L_R^2 \|\rho \text{grad}\mathcal{L}(w)\|_w^2 + \frac{1}{2} \|\text{grad}\mathcal{L}(w)\|_w^2 \\ &\leq \rho^2 L_R^2 \left( 2\|\text{grad}\mathcal{L}_t(w) - \text{grad}\mathcal{L}(w)\|_w^2 + 2\|\text{grad}\mathcal{L}(w)\|_w^2 \right) + \left( \frac{1}{2} + \rho^2 L_R^2 \right) \|\text{grad}\mathcal{L}(w)\|_w^2 \\ &\leq \frac{2\rho^2 L_R^2 \sigma^2}{b} + \left( \frac{1}{2} + 3\rho^2 L_R^2 \right) \|\text{grad}\mathcal{L}(w)\|_w^2 \end{aligned}$$

483 From the above inequality, we could finally bound the term  $T_1$  as

$$T_1 \geq -\frac{2\rho^2 L_R^2 \sigma^2}{b} - \left(\frac{1}{2} + 3\rho^2 L_R^2\right) \|\text{grad}\mathcal{L}(w)\|_w^2$$

484 Regarding the term  $T_2$ , we just use the lemma as

$$T_2 = \langle \mathcal{T}(\zeta)_{w^*}^w \text{grad}\mathcal{L}_t(w^*), \text{grad}\mathcal{L}(w) \rangle_w \geq (1 - \rho L_R) \|\text{grad}\mathcal{L}(w)\|_w^2$$

485 Hence, we arrive at

$$\mathbb{E} \left[ \left\langle \mathcal{T}(\gamma)_{w^{adv}}^w \text{grad}\mathcal{L}_t(w^{adv}), \text{grad}\mathcal{L}(w) \right\rangle_w \right] \geq \left( \frac{1}{2} - \rho L_R - 3\rho^2 L_R^2 \right) \|\text{grad}\mathcal{L}(w)\|_w^2 - \frac{2\rho^2 L_R^2 \sigma^2}{b}$$

486

□

487 According to Algorithm 1, we follow the notation as

$$\begin{aligned} \text{grad}\mathcal{L}_t(w) &= \frac{1}{b} \sum_{i \in I_t} \text{grad}\ell_i(w) \\ w_t^{adv} &= R_{w_t}(\rho \text{grad}\mathcal{L}_t(w_t)) \end{aligned}$$

488 We assume the stochastic  $m$ -SAM where the same batch is used for both inner and outer updates.

489 **Lemma 3** (Descent inequality). *Under the assumptions in Theorem 1, we have*

$$\mathbb{E}[\mathcal{L}(w_{t+1})] \leq \mathbb{E}[\mathcal{L}(w_t)] - \frac{3\alpha}{8} \mathbb{E}[\|\text{grad}\mathcal{L}(w_t)\|_{w_t}^2] + \frac{\alpha^2 L_S \sigma^2}{b} + \frac{2\alpha^2 L_S^3 \rho^2 \sigma^2}{b} + \frac{2\alpha \rho^3 L_R^2 \sigma^2}{b}$$

490 *Proof.* Using the condition (C-4), we have

$$\begin{aligned} \mathcal{L}(w_{t+1}) &= \mathcal{L} \left( R_{w_t} \left( -\alpha \mathcal{T}(\gamma)_{w_t^{adv}}^{w_t} \text{grad}\mathcal{L}_t(w_t^{adv}) \right) \right) \\ &\leq \mathcal{L}(w_t) - \alpha \left\langle \text{grad}\mathcal{L}(w_t), \mathcal{T}(\gamma)_{w_t^{adv}}^{w_t} \text{grad}\mathcal{L}_t(w_t^{adv}) \right\rangle_{w_t} + \frac{\alpha^2 L_S}{2} \left\| \mathcal{T}(\gamma)_{w_t^{adv}}^{w_t} \text{grad}\mathcal{L}_t(w_t^{adv}) \right\|_{w_t}^2 \end{aligned}$$

491 For the last term in RHS, we can bound as

$$\begin{aligned} \left\| \mathcal{T}(\gamma)_{w_t^{adv}}^{w_t} \text{grad}\mathcal{L}_t(w_t^{adv}) \right\|_{w_t}^2 &= -\|\text{grad}\mathcal{L}(w_t)\|_{w_t}^2 + \left\| \mathcal{T}(\gamma)_{w_t^{adv}}^{w_t} \text{grad}\mathcal{L}_t(w_t^{adv}) - \text{grad}\mathcal{L}(w_t) \right\|_{w_t}^2 \\ &\quad + 2 \left\langle \mathcal{T}(\gamma)_{w_t^{adv}}^{w_t} \text{grad}\mathcal{L}_t(w_t^{adv}), \text{grad}\mathcal{L}(w_t) \right\rangle_{w_t} \end{aligned}$$

492 Again, we have

$$\begin{aligned} \mathcal{L}(w_{t+1}) &\leq \mathcal{L}(w_t) - \alpha \left\langle \text{grad}\mathcal{L}(w_t), \mathcal{T}(\gamma)_{w_t^{adv}}^{w_t} \text{grad}\mathcal{L}_t(w_t^{adv}) \right\rangle_{w_t} + \frac{\alpha^2 L_S}{2} \left\| \mathcal{T}(\gamma)_{w_t^{adv}}^{w_t} \text{grad}\mathcal{L}_t(w_t^{adv}) \right\|_{w_t}^2 \\ &= \mathcal{L}(w_t) - \frac{\alpha^2 L_S}{2} \|\text{grad}\mathcal{L}(w_t)\|_{w_t}^2 + \frac{\alpha^2 L_S}{2} \left\| \mathcal{T}(\gamma)_{w_t^{adv}}^{w_t} \text{grad}\mathcal{L}_t(w_t^{adv}) - \text{grad}\mathcal{L}(w_t) \right\|_{w_t}^2 \\ &\quad - \alpha(1 - \alpha L_S) \left\langle \mathcal{T}(\gamma)_{w_t^{adv}}^{w_t} \text{grad}\mathcal{L}_t(w_t^{adv}), \text{grad}\mathcal{L}(w_t) \right\rangle_{w_t} \\ &\leq \mathcal{L}(w_t) - \frac{\alpha^2 L_S}{2} \|\text{grad}\mathcal{L}(w_t)\|_{w_t}^2 + \alpha^2 L_S \left\| \mathcal{T}(\gamma)_{w_t^{adv}}^{w_t} \text{grad}\mathcal{L}_t(w_t^{adv}) - \text{grad}\mathcal{L}_t(w_t) \right\|_{w_t}^2 \\ &\quad + \alpha^2 L_S \|\text{grad}\mathcal{L}_t(w_t) - \text{grad}\mathcal{L}(w_t)\|_{w_t}^2 - \alpha(1 - \alpha L_S) \left\langle \mathcal{T}(\gamma)_{w_t^{adv}}^{w_t} \text{grad}\mathcal{L}_t(w_t^{adv}), \text{grad}\mathcal{L}(w_t) \right\rangle_{w_t} \\ &\leq \mathcal{L}(w_t) - \frac{\alpha^2 L_S}{2} \|\text{grad}\mathcal{L}(w_t)\|_{w_t}^2 + \alpha^2 L_S^3 \rho^2 \|\text{grad}\mathcal{L}_t(w_t)\|_{w_t}^2 + \alpha^2 L_S \|\text{grad}\mathcal{L}_t(w_t) - \text{grad}\mathcal{L}(w_t)\|_{w_t}^2 \\ &\quad - \alpha(1 - \alpha L_S) \left\langle \mathcal{T}(\gamma)_{w_t^{adv}}^{w_t} \text{grad}\mathcal{L}_t(w_t^{adv}), \text{grad}\mathcal{L}(w_t) \right\rangle_{w_t} \\ &\leq \mathcal{L}(w_t) - \frac{\alpha^2 L_S}{2} \|\text{grad}\mathcal{L}(w_t)\|_{w_t}^2 + 2\alpha^2 L_S^3 \rho^2 \|\text{grad}\mathcal{L}(w_t)\|_{w_t}^2 + 2\alpha^2 L_S^3 \rho^2 \|\text{grad}\mathcal{L}_t(w_t) - \text{grad}\mathcal{L}(w_t)\|_{w_t}^2 \\ &\quad + \alpha^2 L_S \|\text{grad}\mathcal{L}_t(w_t) - \text{grad}\mathcal{L}(w_t)\|_{w_t}^2 - \alpha(1 - \alpha L_S) \left\langle \mathcal{T}(\gamma)_{w_t^{adv}}^{w_t} \text{grad}\mathcal{L}_t(w_t^{adv}), \text{grad}\mathcal{L}(w_t) \right\rangle_{w_t} \\ &= \mathcal{L}(w_t) - \frac{\alpha^2 L_S (1 - 4L_S^2 \rho^2)}{2} \|\text{grad}\mathcal{L}(w_t)\|_{w_t}^2 + \alpha^2 L_S (1 + 2L_S^2 \rho^2) \|\text{grad}\mathcal{L}_t(w_t) - \text{grad}\mathcal{L}(w_t)\|_{w_t}^2 \\ &\quad - \alpha(1 - \alpha L_S) \left\langle \mathcal{T}(\gamma)_{w_t^{adv}}^{w_t} \text{grad}\mathcal{L}_t(w_t^{adv}), \text{grad}\mathcal{L}(w_t) \right\rangle_{w_t} \end{aligned}$$

493 Taking the expectation on both sides, we have

$$\begin{aligned}\mathbb{E}[\mathcal{L}(w_{t+1})] &\leq \mathbb{E}[\mathcal{L}(w_t)] - \frac{\alpha^2 L_S(1 - 4L_S^2 \rho^2)}{2} \mathbb{E}[\|\text{grad}\mathcal{L}(w_t)\|_{w_t}^2] + \frac{\alpha^2 L_S(1 + 2L_S^2 \rho^2)\sigma^2}{b} \\ &\quad - \alpha(1 - \alpha L_S) \mathbb{E}\left[\left\langle \mathcal{T}(\gamma)_{w_t^{adv}}^{w_t} \text{grad}\mathcal{L}_t(w_t^{adv}), \text{grad}\mathcal{L}(w_t) \right\rangle_{w_t}\right] \\ \mathbb{E}[\mathcal{L}(w_t)] &- \frac{\alpha^2 L_S(1 - 4L_S^2 \rho^2)}{2} \mathbb{E}[\|\text{grad}\mathcal{L}(w_t)\|_{w_t}^2] + \frac{\alpha^2 L_S(1 + 2L_S^2 \rho^2)\sigma^2}{b} \\ &- \alpha(1 - \alpha L_S) \left[ \left( \frac{1}{2} - \rho L_R - 3\rho^2 L_R^2 \right) \mathbb{E}[\|\text{grad}\mathcal{L}(w_t)\|_{w_t}^2] - \frac{2\rho^2 L_R^2 \sigma^2}{b} \right]\end{aligned}$$

494 For sufficiently large number of total iteration  $T$ , the condition  $\rho \leq \frac{1}{4L}$  is easily satisfied where  $\tilde{L} =$   
495  $\max\{L_R, L_S\}$  (defined in Theorem 1). Hence, we obtain

$$\begin{aligned}\frac{3\alpha}{8} \mathbb{E}[\|\text{grad}\mathcal{L}(w_t)\|_{w_t}^2] &\leq \mathbb{E}[\mathcal{L}(w_t)] - \mathbb{E}[\mathcal{L}(w_{t+1})] + \frac{\alpha^2 L_S(1 + 2L_S^2 \rho^2)\sigma^2}{b} + \frac{2\alpha(1 - \alpha L_S)\rho^3 L_R^2 \sigma^2}{b} \\ &\leq \mathbb{E}[\mathcal{L}(w_t)] - \mathbb{E}[\mathcal{L}(w_{t+1})] + \frac{\alpha^2 L_S \sigma^2}{b} + \frac{2\alpha^2 L_S^3 \rho^2 \sigma^2}{b} + \frac{2\alpha \rho^3 L_R^2 \sigma^2}{b}\end{aligned}$$

496 By telescoping the above inequality from  $t = 0 \sim T - 1$ , we arrive at

$$\mathbb{E}[\|\text{grad}\mathcal{L}(\tilde{w})\|_{\tilde{w}}^2] = \frac{1}{T} \sum_{t=0}^{T-1} \mathbb{E}[\|\text{grad}\mathcal{L}(w_t)\|_{w_t}^2] \leq \frac{8\Delta}{3\alpha T} + \frac{8\alpha^2 L_S \sigma^2}{3b} + \frac{16\alpha^2 L_S^3 \rho^2 \sigma^2}{3b} + \frac{16\alpha \rho^3 L_R^2 \sigma^2}{3b}$$

497 Under the step size condition  $\alpha_t = \frac{1}{\sqrt{T}L}$  and  $\rho_t = \frac{1}{T^{1/6}L}$ , we finally get

$$\mathbb{E}[\|\text{grad}\mathcal{L}(\tilde{w})\|_{\tilde{w}}^2] \leq \frac{Q_1 \tilde{L} \Delta}{\sqrt{T}} + \frac{Q_2 \sigma^2}{b\sqrt{T}} + \frac{Q_3 \sigma^2}{bT^{5/6}}$$

498 for appropriate constants  $\{Q_i\}_{i=1}^3$ . □

## 499 B Hyperparameter Details

500 We use the almost same hyperparameters in the study [51] and implement our experiments in Section 5 upon  
 501 its official implementation. For completeness, we summarize the hyperparameter configurations in Table 4 and  
 502 Table 5.

Table 4: Hyperparameter configurations for knowledge graph completion.

| Dimension        | WN18RR |         | FB15k-237 |         |
|------------------|--------|---------|-----------|---------|
|                  | 32     | $\beta$ | 32        | $\beta$ |
| Batch Size       | 1000   | 1000    | 500       | 500     |
| Negative Samples | 50     | 50      | 50        | 50      |
| Margin           | 8.0    | 8.0     | 8.0       | 8.0     |
| Epochs           | 1000   | 1000    | 500       | 500     |
| Max Norm         | 1.5    | 2.5     | 1.5       | 1.5     |
| Max Scaler       | 3.5    | 2.5     | 2.5       | 2.5     |
| Learning Rate    | 0.005  | 0.003   | 0.003     | 0.003   |
| Gradient Norm    | 0.5    | 0.5     | 0.5       | 0.5     |

Table 5: Hyperparameter configurations for machine translation.

| Hyperparameter              | IWSLT’14 | WMT’14 |
|-----------------------------|----------|--------|
| GPU Numbers                 | 4        | 4      |
| Embedding Dimension $d$     | 64       | 64     |
| Feed-forward Dimension      | 256      | 256    |
| Batch Type                  | Token    | Token  |
| Batch Size                  | 10240    | 10240  |
| Gradient Accumulation Steps | 1        | 1      |
| Training Steps              | 40000    | 200000 |
| Dropout                     | 0.0      | 0.1    |
| Attention Dropout           | 0.1      | 0.0    |
| Max Gradient Norm           | 0.5      | 0.5    |
| Warmup Steps                | 8000     | 6000   |
| Decay Method                | noam     | noam   |
| Label Smoothing             | 0.1      | 0.1    |
| Layer Number                | 6        | 6      |
| Head Number                 | 4        | 8      |
| Learning Rate               | 5.0      | 5.0    |
| Adam $\beta_2$              | 0.998    | 0.998  |
